# Supplementary material for: Prenatal Particulate Matter Exposure Is Associated with Saliva DNA Methylation at Age 15: Applying Cumulative DNA Methylation Scores as an Exposure Biomarker
Source: MDPI journal article supplement (doi:10.3390/toxics9100262), 2021-10-13
Supplement: s1 [file s1]

# Supplementary Materials: Prenatal Particulate Matter Exposure Is Associated with Saliva DNA Methylation at Age 15: Applying Cumulative DNA Methylation Scores as an Exposure Biomarker

Kelly M. Bakulski, Jonah D. Fisher, John F. Dou, Arianna Gard, Lisa Schneper, Daniel A. Notterman, Erin B. Ware and Colter Mitchell

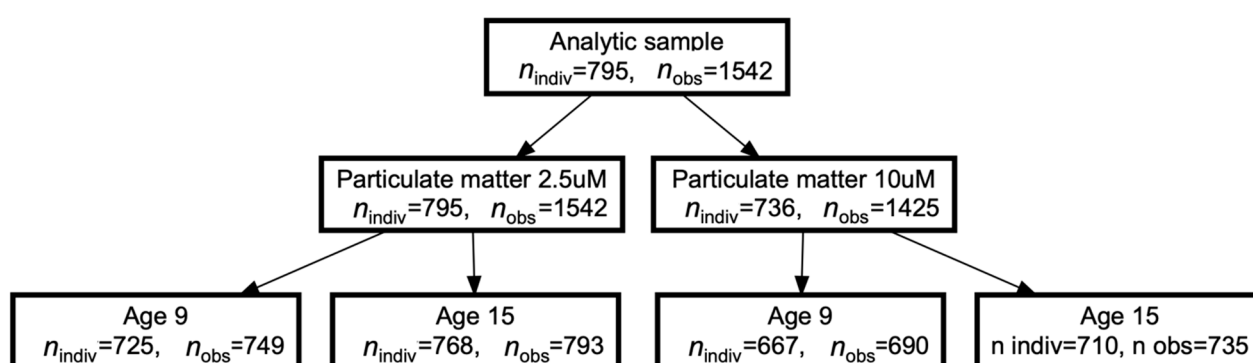

**Figure S1.** Analytic samples by age and particulate matter type in the Fragile Families and Child Wellbeing Study.  $n_{\text{indiv}}$  represents the sample size of individual participants.  $n_{\text{obs}}$  represents the number of DNA methylation observations. The number of observations can exceed the participants when repeated measures are available.

**Table S1.** Descriptive statistics of the included and excluded study samples from the Fragile Families and Child Wellbeing study.

|                                  | Overall<br>$n = 1811$ | Excluded sample<br>$n = 269$ | Included sample<br>$n = 1542$ | $p$ -value | $n$  |
|----------------------------------|-----------------------|------------------------------|-------------------------------|------------|------|
| Age at visit                     |                       |                              |                               | 0.517      | 1811 |
| Age 9                            | 886 (48.9%)           | 137 (50.9%)                  | 749 (48.6%)                   |            |      |
| Age 15                           | 925 (51.1%)           | 132 (49.1%)                  | 793 (51.4%)                   |            |      |
| Child sex                        |                       |                              |                               | 0.688      | 1811 |
| Female                           | 899 (49.6%)           | 130 (48.3%)                  | 769 (49.9%)                   |            |      |
| Male                             | 912 (50.4%)           | 139 (51.7%)                  | 773 (50.1%)                   |            |      |
| Child race/ethnicity             |                       |                              |                               | <0.001     | 1811 |
| Non-Hispanic White               | 314 (17.3%)           | 58 (21.6%)                   | 256 (16.6%)                   |            |      |
| Non-Hispanic Black               | 965 (53.3%)           | 97 (36.1%)                   | 868 (56.3%)                   |            |      |
| Hispanic                         | 410 (22.6%)           | 104 (38.7%)                  | 306 (19.8%)                   |            |      |
| Other                            | 50 (2.76%)            | 6 (2.23%)                    | 44 (2.85%)                    |            |      |
| Multi-Racial                     | 72 (3.98%)            | 4 (1.49%)                    | 68 (4.41%)                    |            |      |
| Age at DNA methylation measure   | 12.5 (3.09)           | 12.8 (3.22)                  | 12.4 (3.07)                   | 0.115      | 1780 |
| Missing                          | 31 (100%)             | 31 (100%)                    | 0 (0.00%)                     | .          | 31   |
| Maternal income/poverty at birth | 2.24 (2.45)           | 2.07 (2.17)                  | 2.27 (2.49)                   | 0.179      | 1811 |

|                                     | Overall<br><i>n</i> = 1811 | Excluded sample<br><i>n</i> = 269 | Included sample<br><i>n</i> = 1542 | <i>p</i> -value | <i>n</i> |
|-------------------------------------|----------------------------|-----------------------------------|------------------------------------|-----------------|----------|
| Maternal race/ethnicity             |                            |                                   |                                    | <0.001          | 1811     |
| Non-Hispanic White                  | 336 (18.6%)                | 62 (23.0%)                        | 274 (17.8%)                        |                 |          |
| Non-Hispanic Black                  | 999 (55.2%)                | 97 (36.1%)                        | 902 (58.5%)                        |                 |          |
| Hispanic                            | 416 (23.0%)                | 104 (38.7%)                       | 312 (20.2%)                        |                 |          |
| Other                               | 60 (3.31%)                 | 6 (2.23%)                         | 54 (3.50%)                         |                 |          |
| Maternal marital status             |                            |                                   |                                    | 0.579           | 1807     |
| Married                             | 423 (23.4%)                | 58 (21.9%)                        | 365 (23.7%)                        |                 |          |
| Not Married                         | 1384 (76.6%)               | 207 (78.1%)                       | 1177 (76.3%)                       |                 |          |
| Missing                             | 4 (100%)                   | 4 (100%)                          | 0 (0.00%)                          | .               | 4        |
| Maternal city of residence at birth |                            |                                   |                                    | .               | 1811     |
| Oakland                             | 116 (6.41%)                | 2 (0.74%)                         | 114 (7.39%)                        |                 |          |
| Austin                              | 127 (7.01%)                | 127 (47.2%)                       | 0 (0.00%)                          |                 |          |
| Baltimore                           | 107 (5.91%)                | 10 (3.72%)                        | 97 (6.29%)                         |                 |          |
| Detroit                             | 335 (18.5%)                | 23 (8.55%)                        | 312 (20.2%)                        |                 |          |
| Newark                              | 56 (3.09%)                 | 5 (1.86%)                         | 51 (3.31%)                         |                 |          |
| Philadelphia                        | 125 (6.90%)                | 5 (1.86%)                         | 120 (7.78%)                        |                 |          |
| Richmond                            | 160 (8.83%)                | 17 (6.32%)                        | 143 (9.27%)                        |                 |          |
| Corpus Christi                      | 112 (6.18%)                | 19 (7.06%)                        | 93 (6.03%)                         |                 |          |
| Indianapolis                        | 93 (5.14%)                 | 1 (0.37%)                         | 92 (5.97%)                         |                 |          |
| Milwaukee                           | 87 (4.80%)                 | 6 (2.23%)                         | 81 (5.25%)                         |                 |          |
| New York                            | 36 (1.99%)                 | 6 (2.23%)                         | 30 (1.95%)                         |                 |          |
| San Jose                            | 84 (4.64%)                 | 5 (1.86%)                         | 79 (5.12%)                         |                 |          |
| Boston                              | 19 (1.05%)                 | 1 (0.37%)                         | 18 (1.17%)                         |                 |          |
| Nashville                           | 27 (1.49%)                 | 2 (0.74%)                         | 25 (1.62%)                         |                 |          |
| Chicago                             | 82 (4.53%)                 | 9 (3.35%)                         | 73 (4.73%)                         |                 |          |
| Jacksonville                        | 22 (1.21%)                 | 2 (0.74%)                         | 20 (1.30%)                         |                 |          |
| Toledo                              | 102 (5.63%)                | 15 (5.58%)                        | 87 (5.64%)                         |                 |          |
| San Antonio                         | 38 (2.10%)                 | 7 (2.60%)                         | 31 (2.01%)                         |                 |          |
| Pittsburgh                          | 48 (2.65%)                 | 7 (2.60%)                         | 41 (2.66%)                         |                 |          |
| Norfolk                             | 35 (1.93%)                 | 0 (0.00%)                         | 35 (2.27%)                         |                 |          |
| PM2.5 exposure at birth             | 28.0 (7.04)                | 29.7 (6.77)                       | 27.9 (7.04)                        | 0.018           | 1634     |
| Missing                             | 177 (100%)                 | 177 (100%)                        | 0 (0.00%)                          | .               | 177      |
| PM10 exposure at birth              | 15.0 (3.05)                | 14.9 (2.89)                       | 15.0 (3.06)                        | 0.808           | 1515     |
| Missing                             | 296 (100%)                 | 179 (100%)                        | 117 (100%)                         | .               | 296      |
| PM2.5 exposure at age 1             | 25.7 (5.29)                | 24.0 (4.91)                       | 25.9 (5.29)                        | <0.001          | 1677     |
| Missing                             | 134 (100%)                 | 46 (100%)                         | 88 (100%)                          | .               | 134      |
| PM10 exposure at age 1              | 14.3 (3.16)                | 12.3 (3.10)                       | 14.6 (3.05)                        | <0.001          | 1677     |
| Missing                             | 134 (100%)                 | 44 (100%)                         | 90 (100%)                          | .               | 134      |
| PM2.5 exposure at age 3             | 26.4 (7.56)                | 24.4 (6.12)                       | 26.7 (7.72)                        | <0.001          | 1627     |

|                                 | Overall<br><i>n</i> = 1811 | Excluded sample<br><i>n</i> = 269 | Included sample<br><i>n</i> = 1542 | <i>p</i> -value | <i>n</i> |
|---------------------------------|----------------------------|-----------------------------------|------------------------------------|-----------------|----------|
| Missing                         | 184 (100%)                 | 47 (100%)                         | 137 (100%)                         | .               | 184      |
| PM10 exposure at age 3          | 14.0 (3.27)                | 12.4 (2.80)                       | 14.2 (3.28)                        | <0.001          | 1636     |
| Missing                         | 175 (100%)                 | 47 (100%)                         | 128 (100%)                         | .               | 175      |
| PM2.5 methylation score (raw)   | 0.00 (1.00)                | 0.30 (1.86)                       | -0.05 (0.75)                       | 0.003           | 1811     |
| PM10 methylation score (raw)    | 0.00 (1.00)                | 0.48 (2.23)                       | -0.08 (0.51)                       | <0.001          | 1811     |
| NO2 methylation score (raw)     | 0.00 (1.00)                | 0.10 (1.47)                       | -0.02 (0.89)                       | 0.207           | 1811     |
| Percent saliva immune cells     | 93.7 (13.7)                | 92.6 (14.2)                       | 93.9 (13.6)                        | 0.187           | 1811     |
| Percent saliva epithelial cells | 6.33 (13.7)                | 7.38 (14.2)                       | 6.15 (13.6)                        | 0.187           | 1811     |
| Site specific DNA methylation   |                            |                                   |                                    |                 |          |
| cg00905156                      | 2.69 (3.23)                | 3.89 (7.45)                       | 2.48 (1.52)                        | 0.002           | 1811     |
| cg06849931                      | 73.1 (13.6)                | 71.2 (14.1)                       | 73.4 (13.5)                        | 0.019           | 1811     |
| cg15082635                      | 2.16 (3.59)                | 3.59 (9.00)                       | 1.91 (0.77)                        | 0.002           | 1811     |
| cg18640183                      | 5.20 (4.06)                | 7.37 (9.86)                       | 4.82 (1.21)                        | <0.001          | 1811     |
| cg20340716                      | 92.4 (3.95)                | 90.3 (9.45)                       | 92.8 (1.37)                        | <0.001          | 1811     |
| cg24127244                      | 2.68 (3.00)                | 3.94 (7.52)                       | 2.46 (0.65)                        | 0.001           | 1811     |

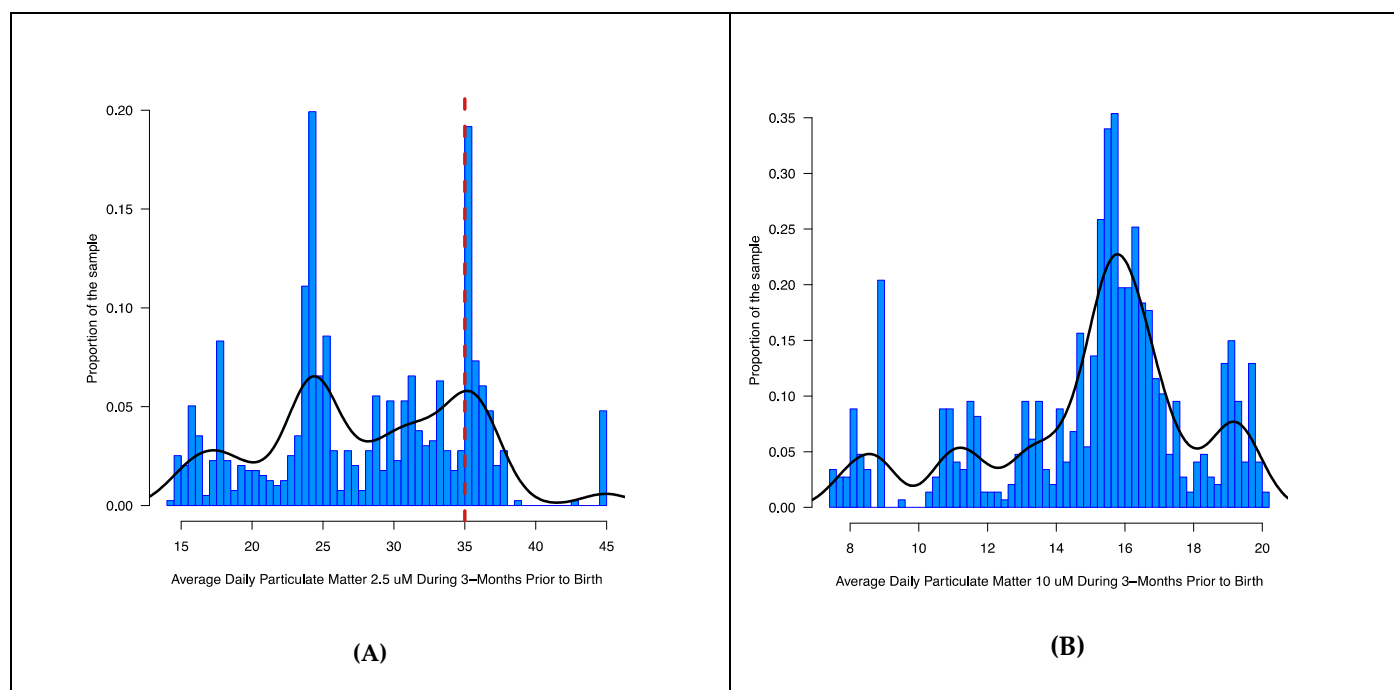

**Figure S2.** Distribution of particulate matter exposure levels during the 3-months prior to birth in the Fragile Families and Child Wellbeing Study. **A)** Particulate matter < 2.5  $\mu\text{M}$  levels measured in  $\mu\text{g}/\text{m}^3/\text{day}$ . The red vertical line corresponds to the United States National Ambient Air Quality Standard (<https://www.epa.gov/criteria-air-pollutants/naaqs-table>). **B)** Particulate matter < 10  $\mu\text{M}$  levels measured in  $\mu\text{g}/\text{m}^3/\text{day}$ .

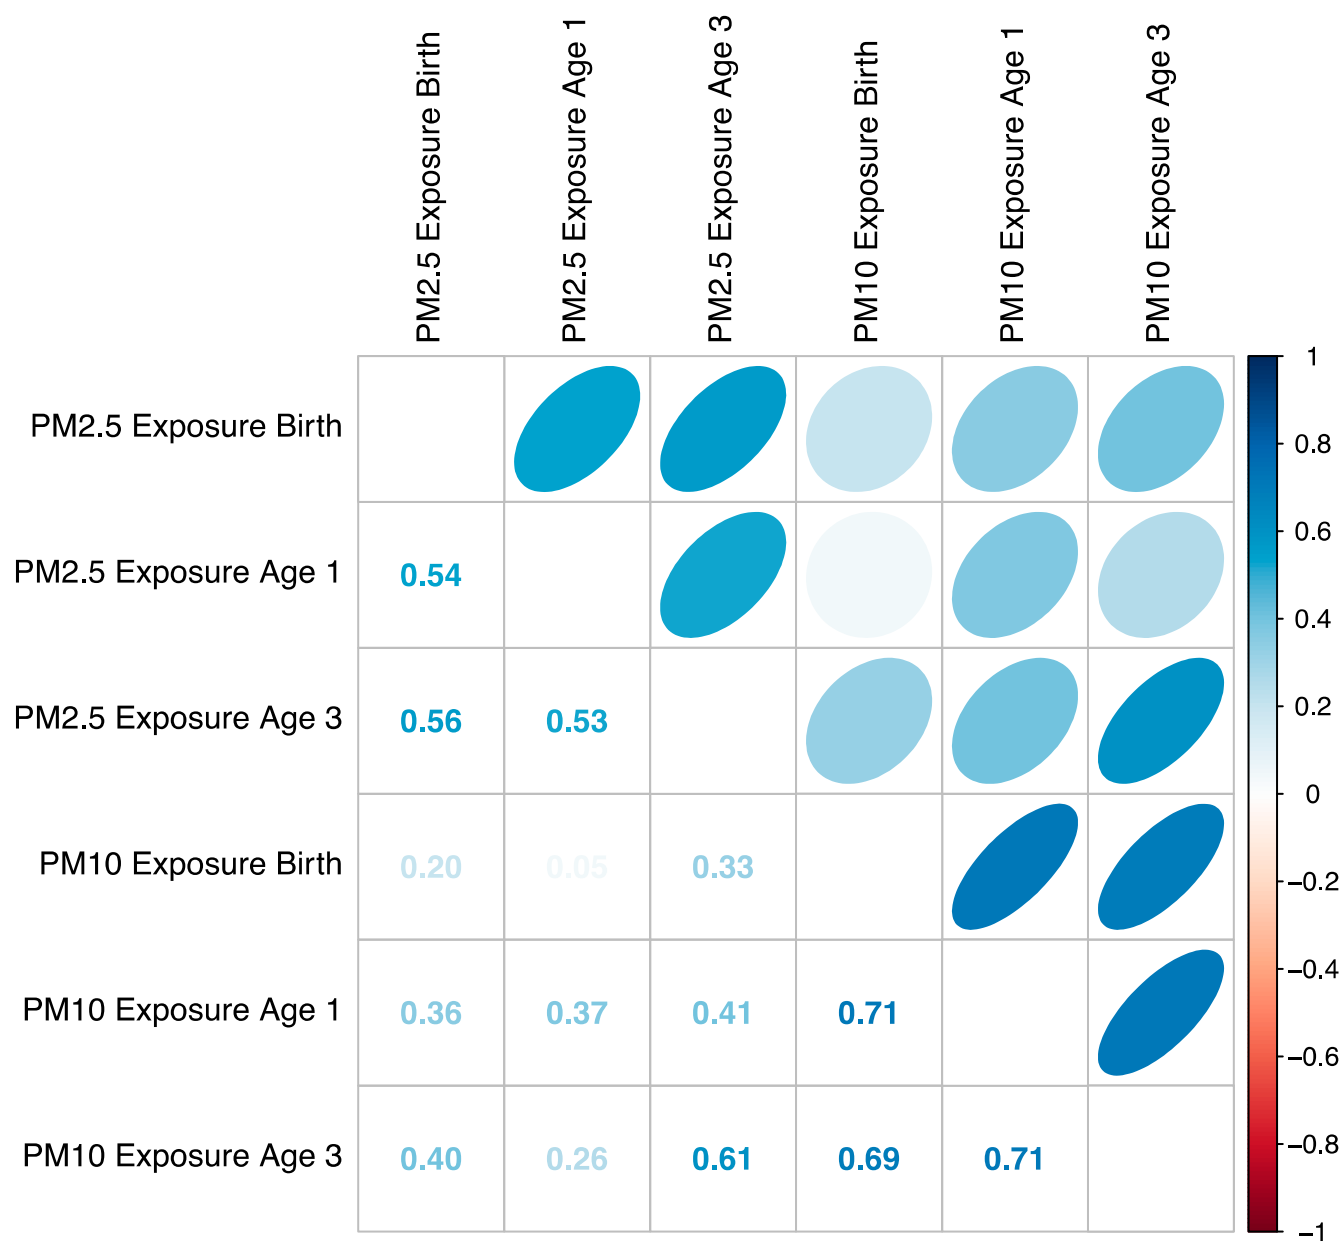

**Figure S3.** Pearson correlations among air pollution levels (PM2.5, PM10) measured at birth, age 1, and age 3 in the Fragile Families and Child Wellbeing Study.

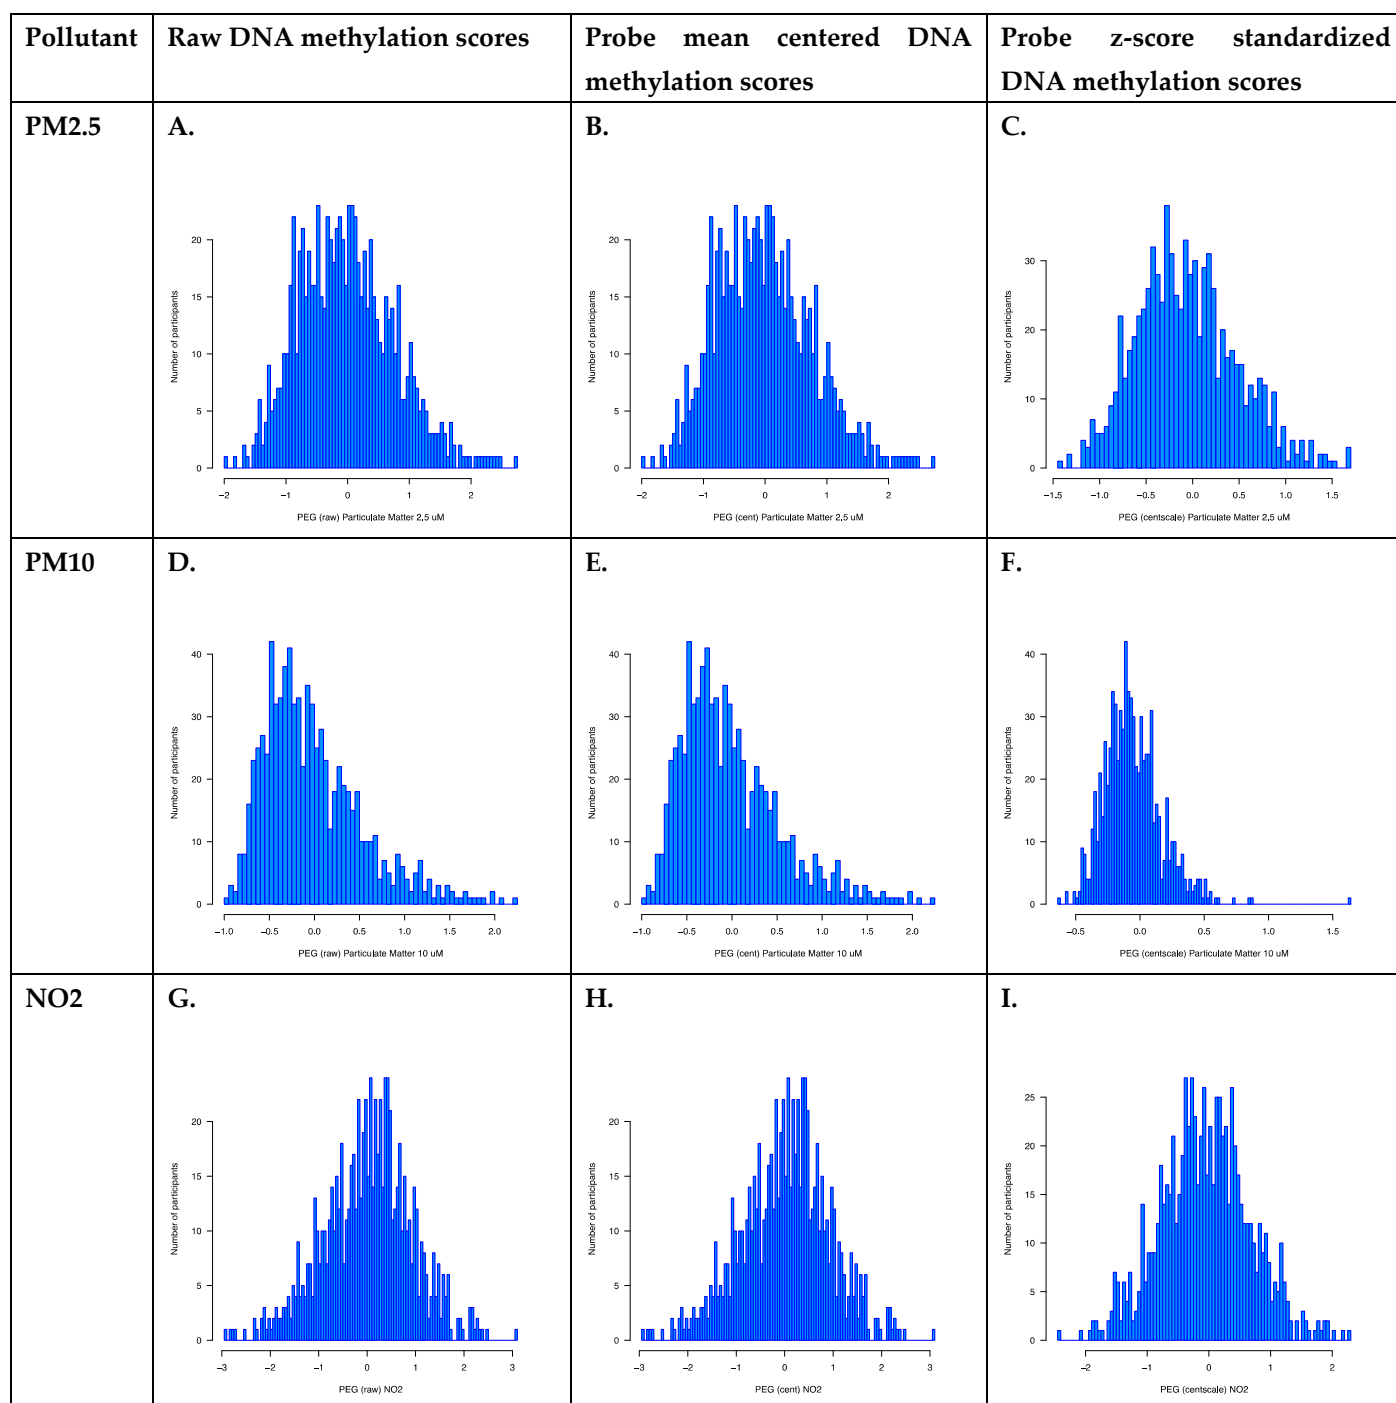

**Figure S4.** Distribution of air pollution cumulative DNA methylation scores in the Fragile Families and Child Wellbeing Study. The rows are organized by pollutant: **A, B, C)** Particulate Matter < 2.5 uM; **D, E, F)** Particulate Matter < 10 uM; **G, H, I)** Nitrogen dioxide. The columns are organized by method of calculation of cumulative DNA methylation scores. **A, D, G)** Raw DNA methylation values were used. **B, E, H)** DNA methylation values were centered within the study sample prior to weighting for the scores. **C, F, I)** DNA methylation values were centered and scaled within the study sample prior to weighting for the scores.

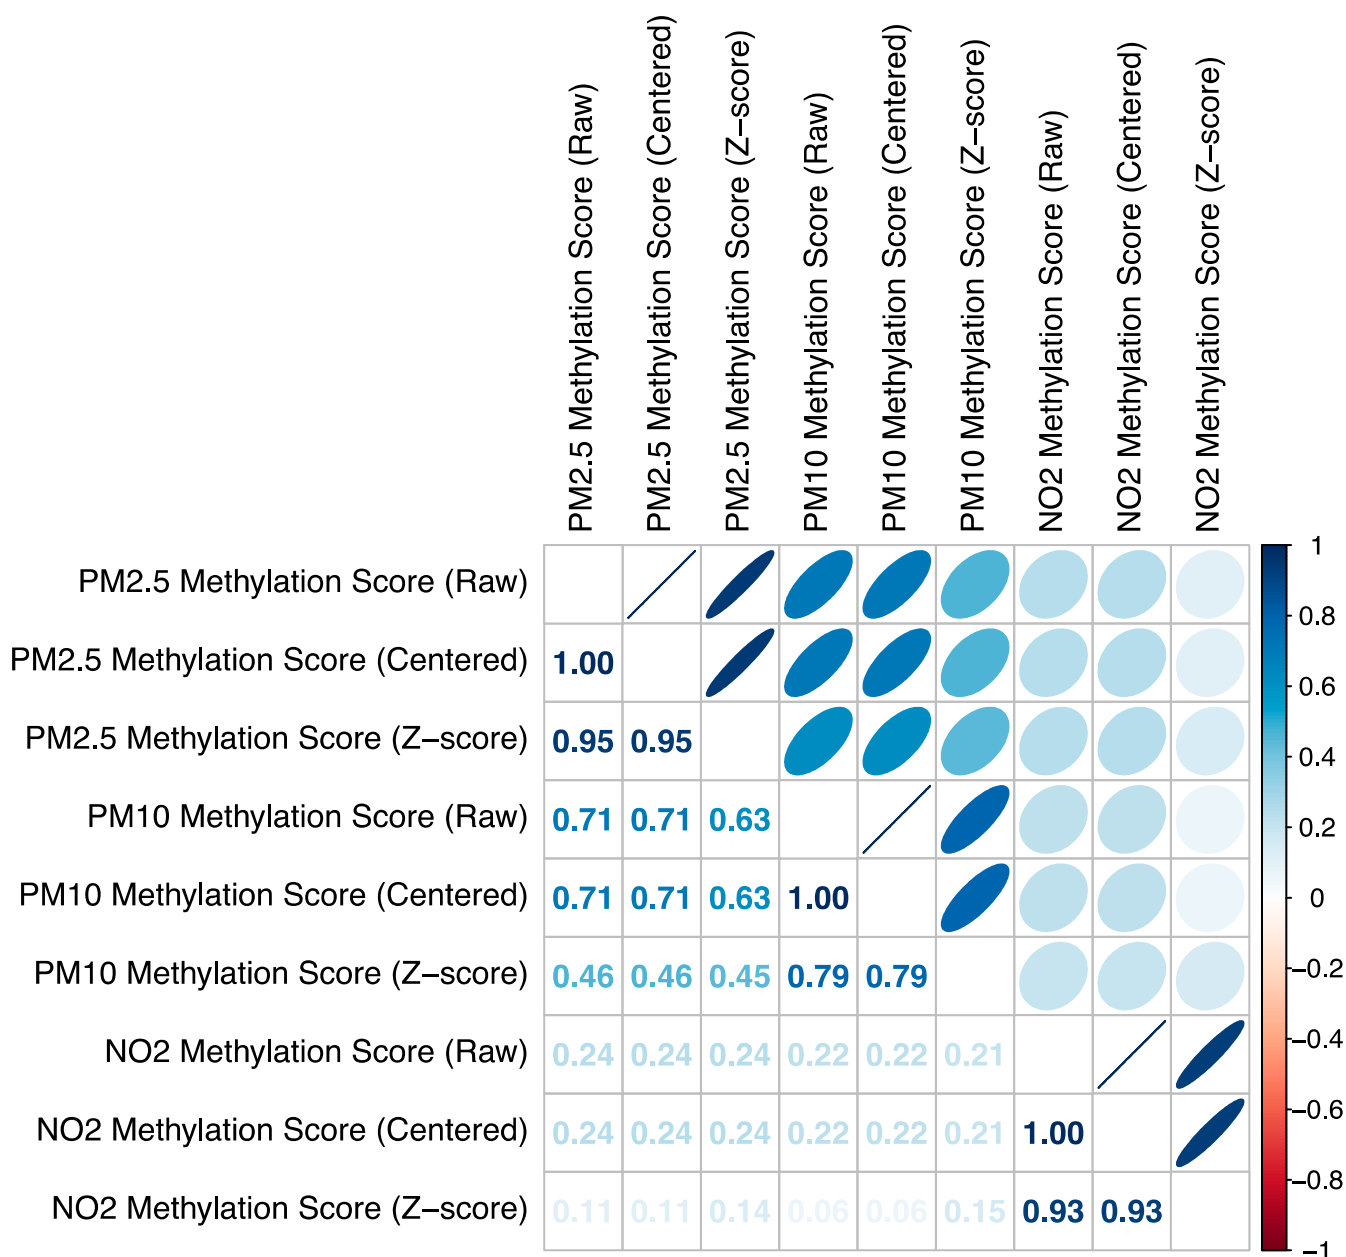

**Figure S5.** Pearson correlations among air pollution cumulative DNA methylation scores in the Fragile Families and Child Wellbeing Study.

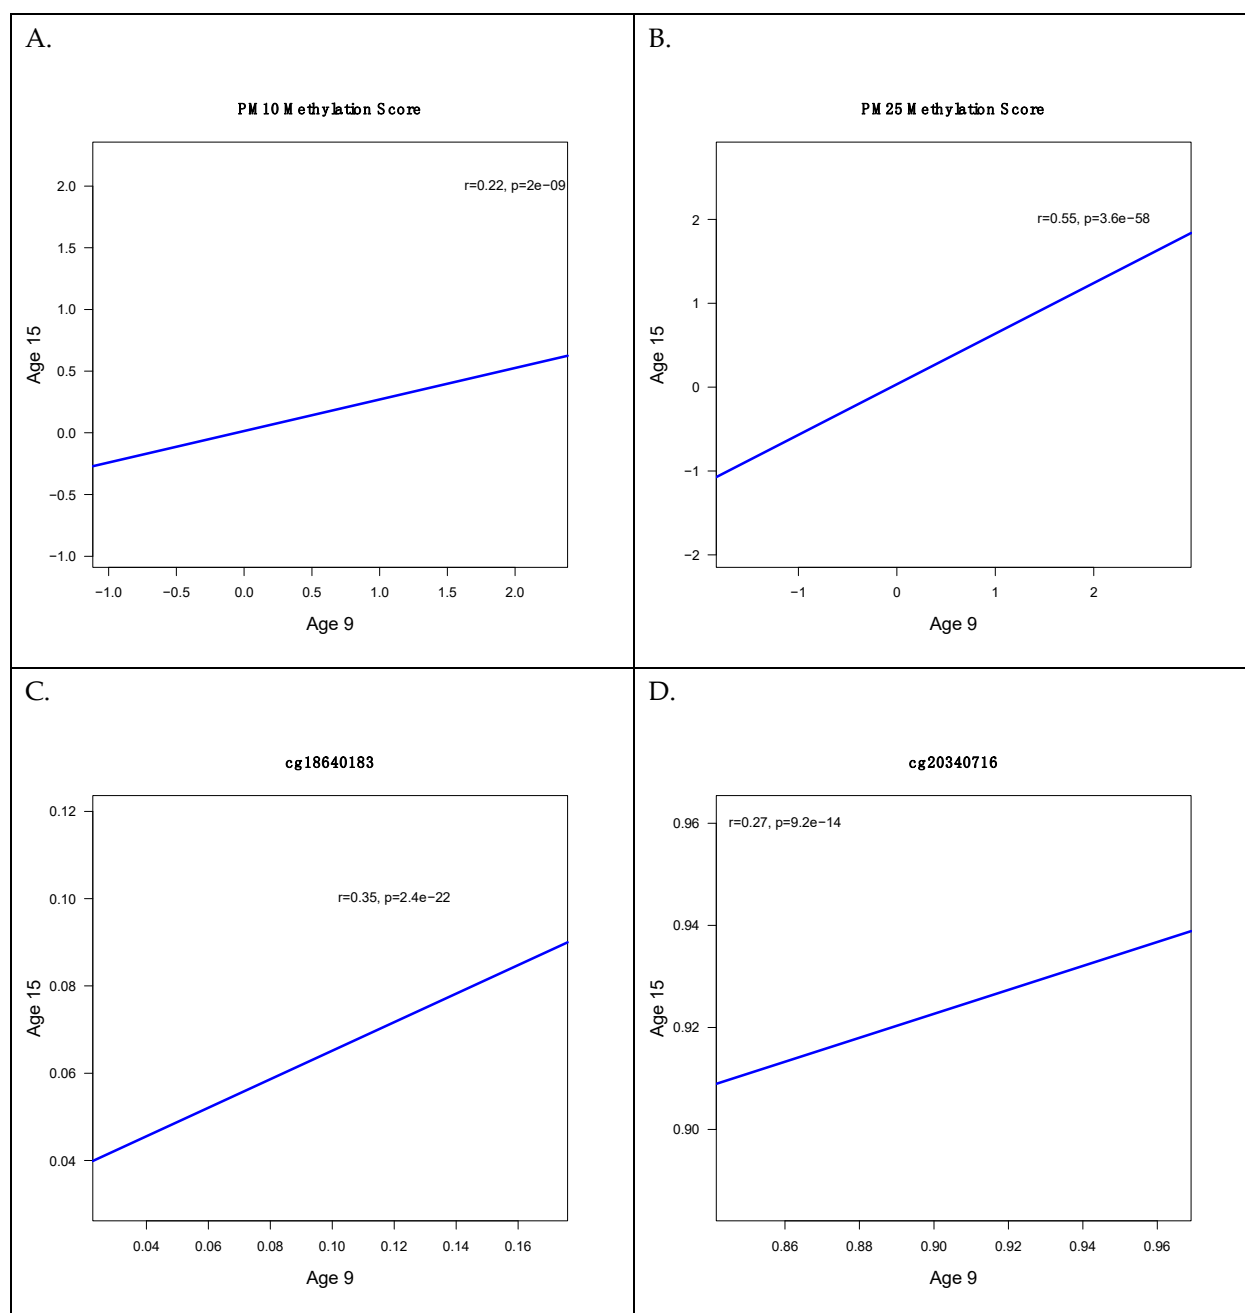

**Figure S6.** Among Fragile Families and Child Wellbeing participants with saliva DNA methylation measures at both age 9 and age 15, scatter plots of the observed DNA methylation measures at each time point. Blue lines represent the best fit of the data and test statistics reflect the Pearson correlation coefficient and p-value. **A)** Cumulative DNA methylation score (centered and standardized) for PM10 exposure. **B)** Cumulative DNA methylation score (centered and standardized) for PM2.5 exposure. **C)** DNA methylation at the site cg18640183, previously identified (Gruzieva et al. 2019) for association with PM10 exposure at birth. **D)** DNA methylation at the site cg20340716, previously identified (Gruzieva et al. 2019) for association with PM10 exposure at birth.

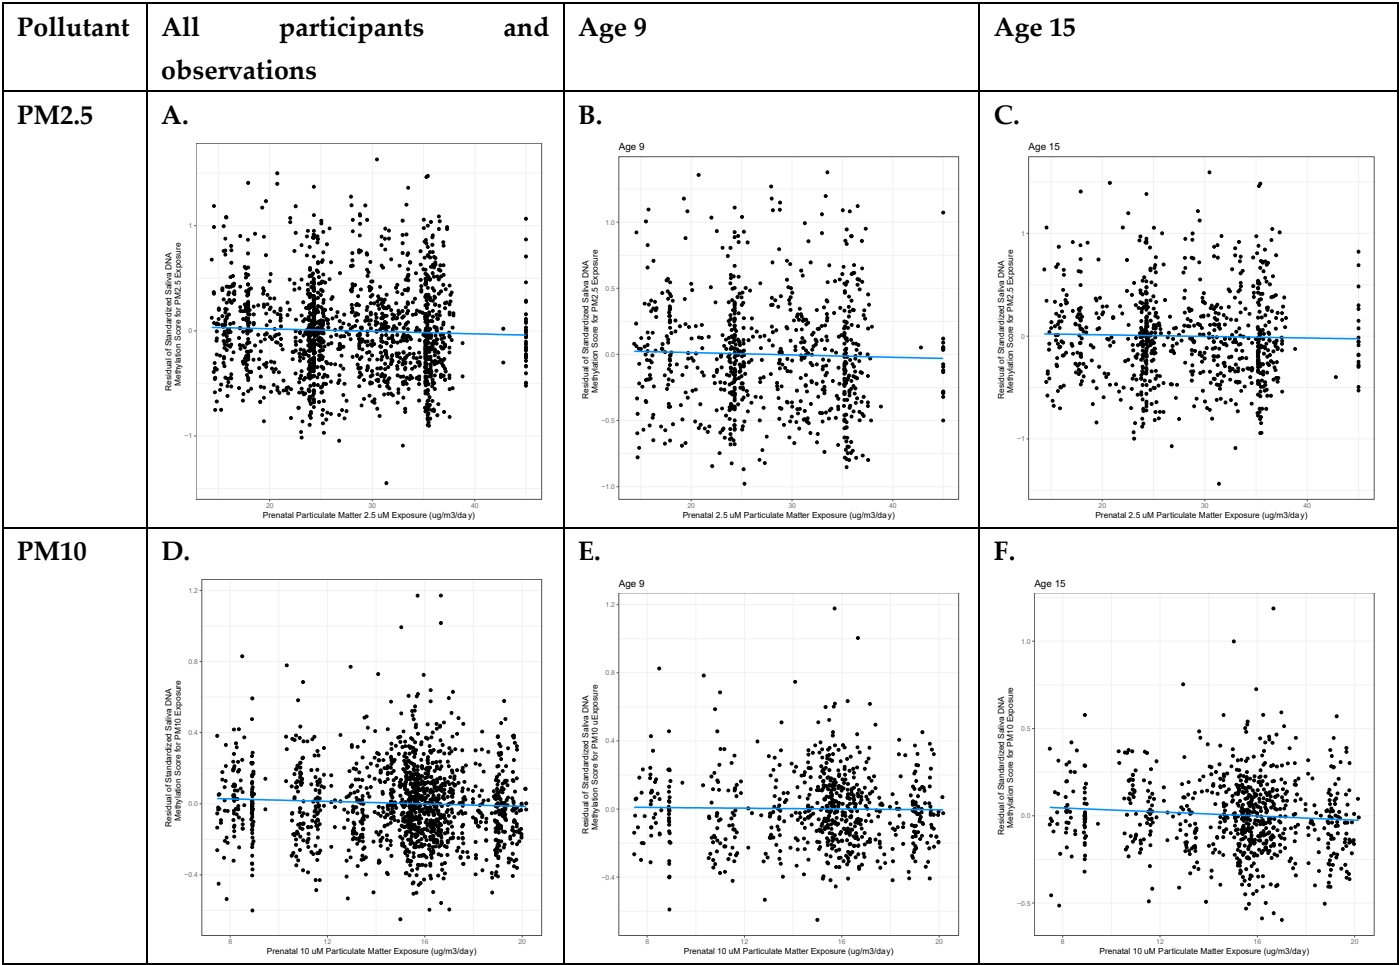

**Figure S7.** Adjusted associations between particulate matter exposure and cumulative DNA methylation score for particulate matter. Models have been adjusted for child sex, child age at DNA methylation measure, maternal income to needs ratio, maternal marital status, maternal race/ethnicity, and cell type proportions.



**Table S2.** Adjusted associations between DNA methylation score for prenatal particulate matter exposure and levels of prenatal particulate matter exposure in the Fragile Families and Child Wellbeing Study. All ages models are mixed effects regression models with random intercepts for participants. Age stratified models are linear regression models. Models are adjusted for age at DNA measurement, child sex, maternal race, maternal income to poverty ratio, proportion epithelial cells, proportion immune cells, and postnatal age 1 air pollution exposure.

| Exposure | Age | N <sub>indiv</sub> | N <sub>obs</sub> | Raw DNA methylation |                           |                           |         | Centered DNA methylation |                           |                           |         | P-value | Estimate |
|----------|-----|--------------------|------------------|---------------------|---------------------------|---------------------------|---------|--------------------------|---------------------------|---------------------------|---------|---------|----------|
|          |     |                    |                  | Effect estimate     | Lower confidence interval | Upper confidence interval | P-value | Effect estimate          | Lower confidence interval | Upper confidence interval | P-value |         |          |
| PM2.5    | All | 738                | 1454             | -0.0173             | -0.0706                   | 0.0360                    | 0.5234  | -0.0173                  | -0.0706                   | 0.0360                    | 0.5234  | -0.0173 | -0.0706  |
| PM2.5    | 9   | 710                | 710              | -0.0101             | -0.0682                   | 0.0480                    | 0.7323  | -0.0101                  | -0.0682                   | 0.0480                    | 0.7323  | -0.0101 | -0.0682  |
| PM2.5    | 15  | 744                | 744              | -0.0058             | -0.0630                   | 0.0513                    | 0.8411  | -0.0058                  | -0.0630                   | 0.0513                    | 0.8411  | -0.0058 | -0.0630  |
| PM10     | All | 682                | 1342             | -0.2422             | -0.4546                   | -0.0298                   | 0.0255  | -0.2422                  | -0.4546                   | -0.0298                   | 0.0255  | -0.2422 | -0.4546  |
| PM10     | 9   | 653                | 653              | -0.0143             | -0.0405                   | 0.0118                    | 0.2828  | -0.0143                  | -0.0405                   | 0.0118                    | 0.2828  | -0.0143 | -0.0405  |
| PM10     | 15  | 689                | 689              | -0.0302             | -0.0556                   | -0.0047                   | 0.0202  | -0.0302                  | -0.0556                   | -0.0047                   | 0.0202  | -0.0302 | -0.0556  |

\* N<sub>indiv</sub> represents the sample size of individual participants

\* N<sub>obs</sub> represents the number of DNA methylation observations. This number of observations may exceed the sample size of individuals when repeated measures are used.

**Table S3.** Adjusted associations between DNA methylation score for prenatal particulate matter exposure and levels of prenatal particulate matter exposure in the Fragile Families and Child Wellbeing Study. All ages models are mixed effects regression models with random intercepts for participants. Age stratified models are linear regression models. Models are adjusted for age at DNA measurement, child sex, maternal race, maternal income to poverty ratio, proportion epithelial cells, proportion immune cells, and postnatal age 3 air pollution exposure.

| Exposure | Age | N <sub>indiv</sub> | N <sub>obs</sub> | Raw DNA methylation |                           |                           |         | Centered DNA methylation |                           |                           |         | P-value | Estimate |
|----------|-----|--------------------|------------------|---------------------|---------------------------|---------------------------|---------|--------------------------|---------------------------|---------------------------|---------|---------|----------|
|          |     |                    |                  | Effect estimate     | Lower confidence interval | Upper confidence interval | P-value | Effect estimate          | Lower confidence interval | Upper confidence interval | P-value |         |          |
| PM2.5    | All | 714                | 1405             | -0.0316             | -0.0893                   | 0.0261                    | 0.2821  | -0.0316                  | -0.0893                   | 0.0261                    | 0.2821  | -0.0316 | -0.0893  |
| PM2.5    | 9   | 684                | 684              | -0.0165             | -0.0793                   | 0.0463                    | 0.6057  | -0.0165                  | -0.0793                   | 0.0463                    | 0.6057  | -0.0165 | -0.0793  |
| PM2.5    | 15  | 721                | 721              | -0.0268             | -0.0883                   | 0.0347                    | 0.3929  | -0.0268                  | -0.0883                   | 0.0347                    | 0.3929  | -0.0268 | -0.0883  |
| PM10     | All | 666                | 1309             | -0.2004             | -0.4204                   | 0.0196                    | 0.0742  | -0.2004                  | -0.4204                   | 0.0196                    | 0.0742  | -0.2004 | -0.4204  |
| PM10     | 9   | 635                | 635              | -0.0036             | -0.0303                   | 0.0231                    | 0.7930  | -0.0036                  | -0.0303                   | 0.0231                    | 0.7930  | -0.0036 | -0.0303  |
| PM10     | 15  | 674                | 674              | -0.0343             | -0.0604                   | -0.0082                   | 0.0100  | -0.0343                  | -0.0604                   | -0.0082                   | 0.0100  | -0.0343 | -0.0604  |

\* N<sub>indiv</sub> represents the sample size of individual participants

\* N<sub>obs</sub> represents the number of DNA methylation observations. This number of observations may exceed the sample size of individuals when repeated measures are used.

**Table S4.** Adjusted associations between DNA methylation score for prenatal particulate matter exposure and levels of prenatal particulate matter exposure in the Fragile Families and Child Wellbeing Study. All ages models are mixed effects regression models with random intercepts for participants. Age stratified models are linear regression models. Models are adjusted for age at DNA measurement, child sex, maternal race, maternal income to poverty ratio, proportion epithelial cells, proportion immune cells, and the co-exposure to particulate matter air pollution (either PM2.5 or PM10).

| Exposure | Age | N <sub>indiv</sub> | N <sub>obs</sub> | Raw DNA methylation |                           |                           | P-value | Centered DNA methylation |                           |                           | P-value | Effect estimate |
|----------|-----|--------------------|------------------|---------------------|---------------------------|---------------------------|---------|--------------------------|---------------------------|---------------------------|---------|-----------------|
|          |     |                    |                  | Effect estimate     | Lower confidence interval | Upper confidence interval |         | Effect estimate          | Lower confidence interval | Upper confidence interval |         |                 |
| PM2.5    | All | 727                | 1425             | -0.0278             | -0.0806                   | 0.0249                    | 0.3007  | -0.0278                  | -0.0806                   | 0.0249                    | 0.3007  | -               |
| PM2.5    | 9   | 690                | 690              | -0.0225             | -0.0781                   | 0.0332                    | 0.4280  | -0.0225                  | -0.0781                   | 0.0332                    | 0.4280  | -               |
| PM2.5    | 15  | 735                | 735              | -0.0225             | -0.0796                   | 0.0346                    | 0.4387  | -0.0225                  | -0.0796                   | 0.0346                    | 0.4387  | -               |
| PM10     | All | 727                | 1425             | -0.1474             | -0.3079                   | 0.0131                    | 0.0718  | -0.1474                  | -0.3079                   | 0.0131                    | 0.0718  | -               |
| PM10     | 9   | 690                | 690              | -0.0043             | -0.0239                   | 0.0153                    | 0.6671  | -0.0043                  | -0.0239                   | 0.0153                    | 0.6671  | -               |
| PM10     | 15  | 735                | 735              | -0.0231             | -0.0424                   | -0.0038                   | 0.0191  | -0.0231                  | -0.0424                   | -0.0038                   | 0.0191  | -               |

\* N<sub>indiv</sub> represents the sample size of individual participants

\* N<sub>obs</sub> represents the number of DNA methylation observations. This number of observations may exceed the sample size of individuals when repeated measures are used.

**Table S5.** Adjusted associations between DNA methylation score for prenatal nitrogen dioxide exposure and levels of prenatal particulate matter exposure in the Fragile Families and Child Wellbeing Study. All ages models are mixed effects regression models with random intercepts for participants. Age stratified models are linear regression models. Models are adjusted for age at DNA measurement, child sex, maternal race, maternal income to poverty ratio, proportion epithelial cells, and proportion immune cells.

| Exposure | Age | N <sub>indiv</sub> | N <sub>obs</sub> | Raw DNA methylation |                           |                           | P-value | Centered DNA methylation |                           |                           | P-value | Effect estimate |
|----------|-----|--------------------|------------------|---------------------|---------------------------|---------------------------|---------|--------------------------|---------------------------|---------------------------|---------|-----------------|
|          |     |                    |                  | Effect estimate     | Lower confidence interval | Upper confidence interval |         | Effect estimate          | Lower confidence interval | Upper confidence interval |         |                 |
| PM2.5    | All | 787                | 1542             | 0.0292              | -0.0551                   | 0.1135                    | 0.4969  | 0.0292                   | -0.0551                   | 0.1135                    | 0.4969  | 0               |
| PM2.5    | 9   | 749                | 749              | 0.0518              | -0.0433                   | 0.1468                    | 0.2853  | 0.0518                   | -0.0433                   | 0.1468                    | 0.2853  | 0               |
| PM2.5    | 15  | 793                | 793              | 0.0306              | -0.0642                   | 0.1254                    | 0.5265  | 0.0306                   | -0.0642                   | 0.1254                    | 0.5265  | -               |
| PM10     | All | 728                | 1425             | 1.4166              | 0.7019                    | 2.1314                    | 0.0001  | 1.4166                   | 0.7019                    | 2.1314                    | 0.0001  | 1               |
| PM10     | 9   | 690                | 690              | 0.1386              | 0.0678                    | 0.2095                    | 0.0001  | 0.1386                   | 0.0678                    | 0.2095                    | 0.0001  | 0               |
| PM10     | 15  | 735                | 735              | 0.1271              | 0.0520                    | 0.2022                    | 0.0009  | 0.1271                   | 0.0520                    | 0.2022                    | 0.0009  | 0               |

\* N<sub>indiv</sub> represents the sample size of individual participants

\* N<sub>obs</sub> represents the number of DNA methylation observations. This number of observations may exceed the sample size of individuals when repeated measures are used.
